# Supplementary material
Source: publisher site journal article supplement (https://www.spandidos-publications.com/6775/downloadSupplementary)
Supplement: Supplementary file 1 [file downloadSupplementary]

## Sheet: Supplementary_Table_SXI
Table SXI. Enriched pathways of cluster 2.
Term	Source	Adjusted P-value	Genes
Cytokine-cytokine receptor interaction	KEGG	3.69e-10	NGF, CXCL2, IL1A, TSLP, CXCL8, CXCL1, IL1B, CXCL3
IL-17 signaling pathway	KEGG	3.33e-08	CXCL2, CXCL8, CXCL1, IL1B, CXCL3
NF-kappa B signaling pathway	KEGG	3.68e-08	CXCL2, CXCL8, CXCL1, IL1B, CXCL3
NOD-like receptor signaling pathway	KEGG	5.39e-07	CXCL2, CXCL8, CXCL1, IL1B, CXCL3
TNF signaling pathway	KEGG	3.55e-06	CXCL2, CXCL1, IL1B, CXCL3
Chemokine signaling pathway	KEGG	2.62e-05	CXCL2, CXCL8, CXCL1, CXCL3
MAPK signaling pathway	KEGG	0.000121306	NGF, IL1A, IL1B, FGF21
Metabolic pathways	KEGG	0.00406343	CYP1A1, CTH, CHAC1, FUT1, ASNS
Apoptosis	mSigDB	0.000198	IL1A, IL1B, CTH, DDIT3, ATF3
Unfolded protein response	mSigDB	0.000583	STC2, ASNS, CHAC1, ATF3
p53 pathway	mSigDB	0.00225617	IL1A, DDIT3, NUPR1, ATF3
mTORC1 signaling	mSigDB	0.00225617	CTH, DDIT3, ASNS, NUPR1
KEGG, Kyoto Encyclopedia of Genes and Genomes; mSigDB, Molecular Signatures Database; NOD, nucleotide-binding oligomerization domain.
